# Supplementary material for: Monocytes give rise to Langerhans cells that preferentially migrate to lymph nodes at steady state
Source: PubMed Central journal article supplement (PMC11588065; doi:10.1073/pnas.2404927121), 2024-11-14
Supplement: pnas.2404927121.sapp.pdf [file pnas.2404927121.sapp.pdf]

# Supplementary Figure 1

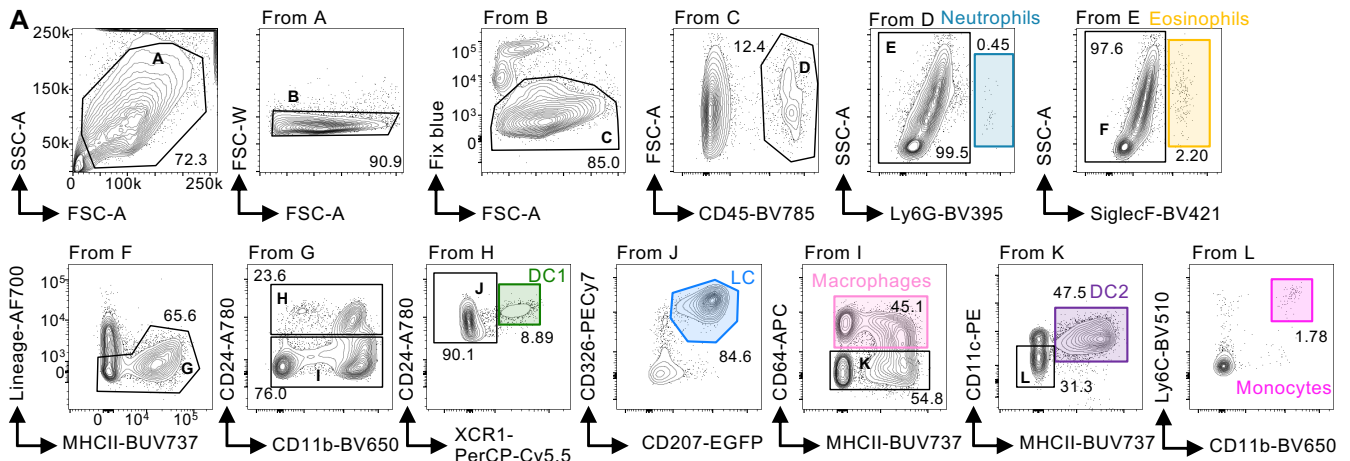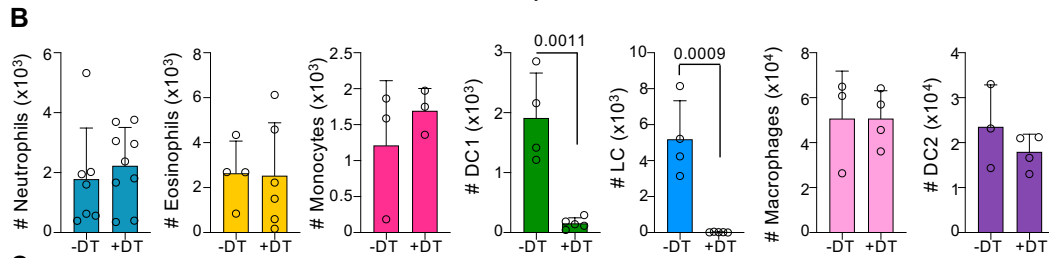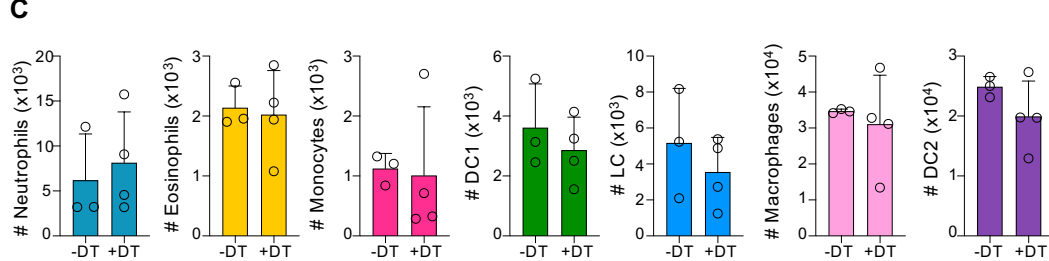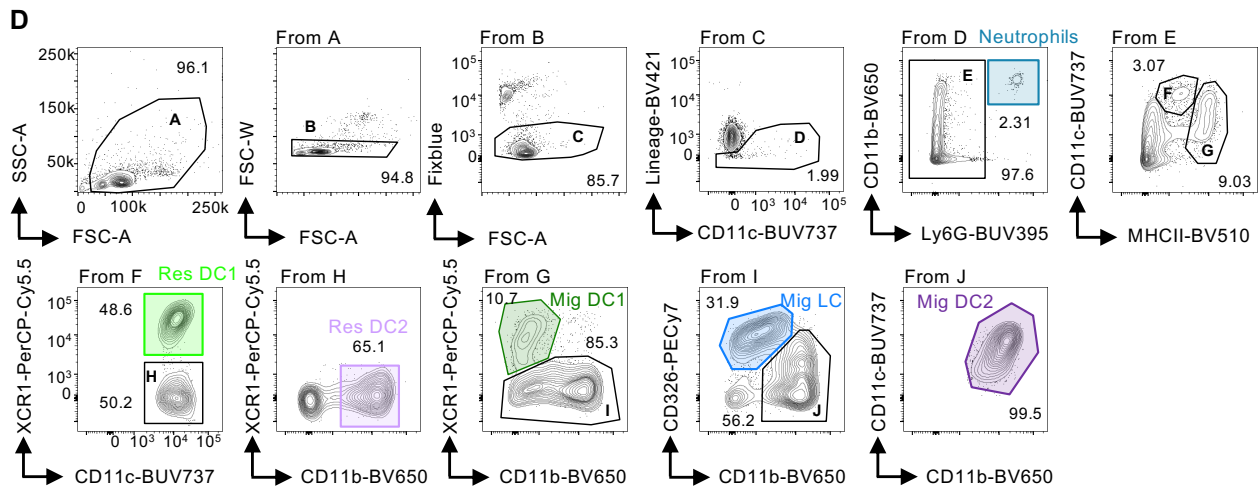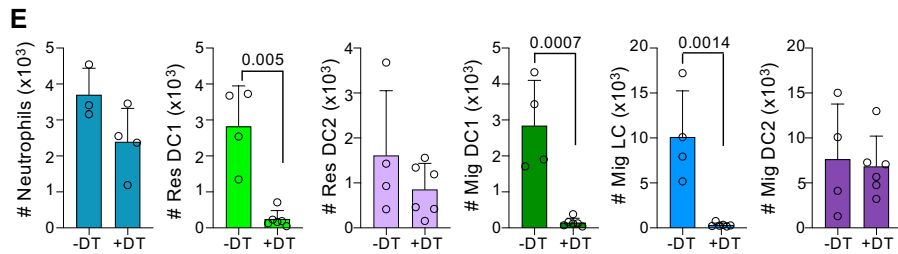

**FIGURE S1. DT inoculation in *Cd207<sup>DTR</sup>* mice specifically depletes LCs and DC1s, without causing inflammation. (A-B)** Balb/c *Cd207<sup>DTR</sup>* mice were injected with 50 ng/gr body weight DT (+DT) or left untreated (-DT), and 2 days later whole skin and sLN were analyzed by flow cytometry. **(A)** Gating strategy used for the identification of different myeloid cells in the skin. **(B)** Number of myeloid cells in the skin shown as the mean + SD (n= 3-9 mice in 2-4 exp.; Student's t-test). **(C)** B6 *Cd207<sup>EGFP</sup>* mice were injected with 50 ng/gr body weight DT (+DT) or left untreated (-DT), and 2 days later whole skin was analyzed by flow cytometry. Number of myeloid cells in the skin shown as the mean + SD (n= 3-4 mice in 2 exp.; Student's t-test). **(D)** As in A, but sLN were analyzed. **(E)** As in B, but the number of myeloid cells in sLN shown as the mean + SD (n=3-6 mice in 3-4 exp.; Student's t-test).

## Supplementary Figure 2

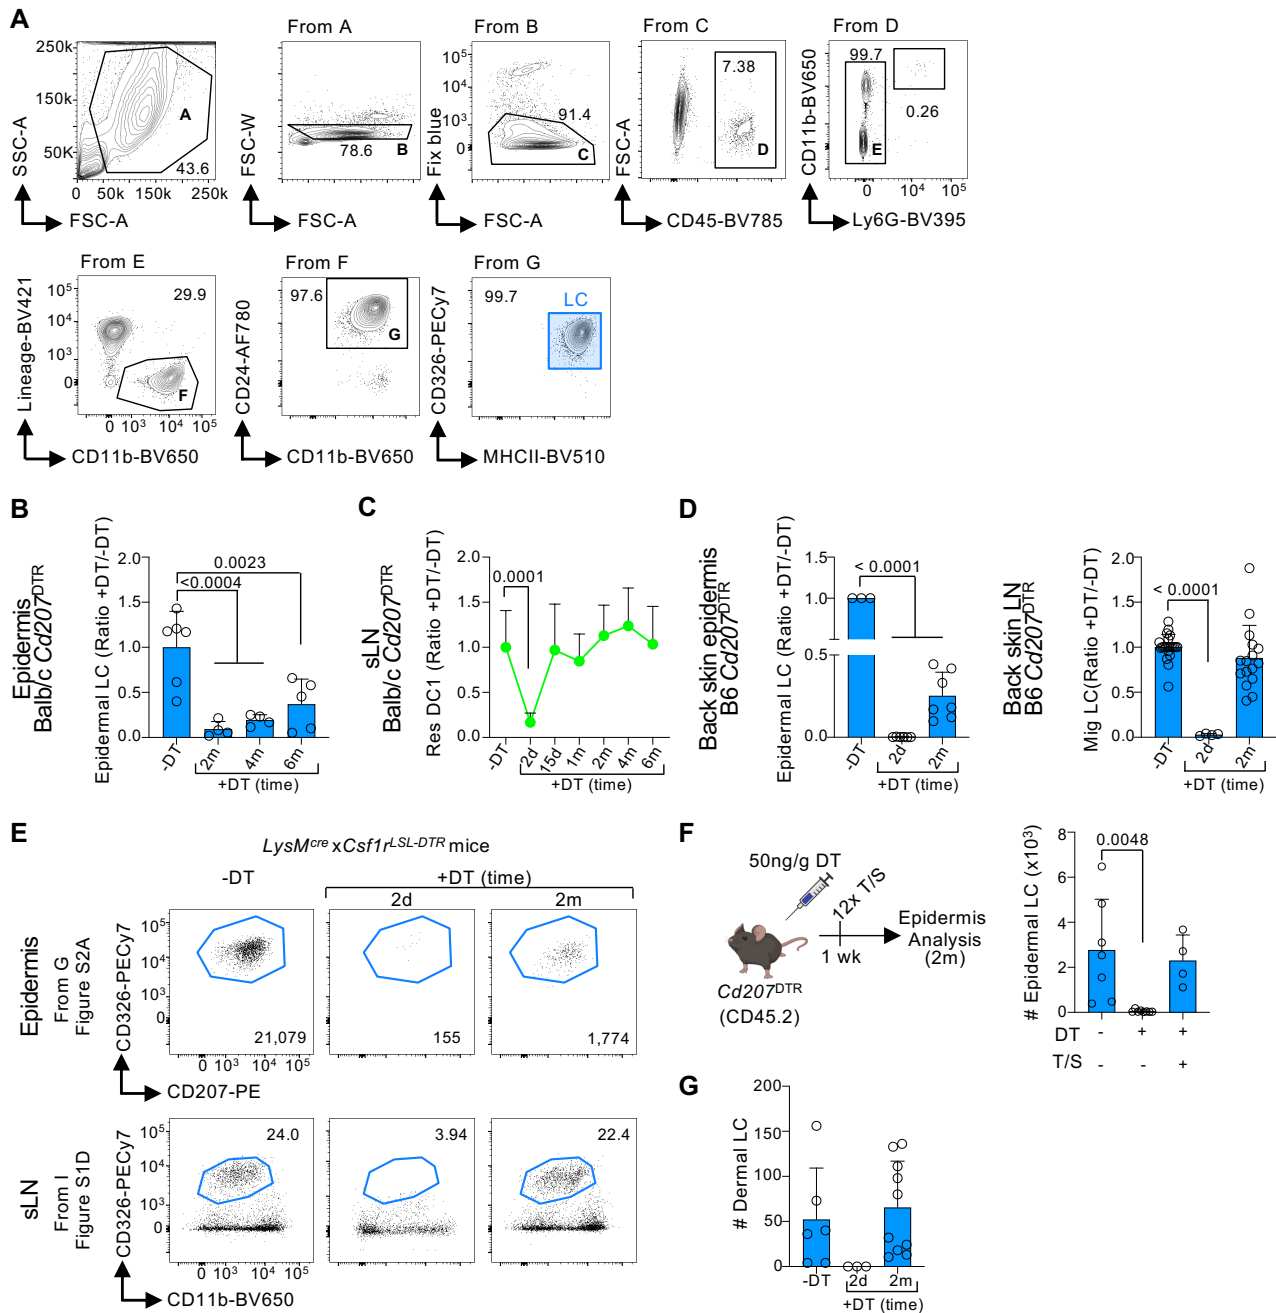

**FIGURE S2. LCs repopulate sLN, but not epidermis, at steady state. (A-C)** Balb/c *Cd207<sup>DTR</sup>* were inoculated with 50 ng/gr body weight DT (+DT) or left untreated (-DT). Epidermis, dermis and sLN were collected and analyzed at different time points. **(A)** Gating strategy for the identification of LCs in epidermal cell suspensions (epidermal LCs). **(B)** Bar graph showing the mean + SD of epidermal LCs in Balb/c *Cd207<sup>DTR</sup>* mice at different times post-DT inoculation, normalized to non-DT controls (n=4-6 mice in 2 exp.; One-way ANOVA with Dunnett's multiple comparison). **(C)** Mean + SD of resident DC1s in the sLN of Balb/c *Cd207<sup>DTR</sup>* mice at different times post-DT inoculation, normalized to non-DT controls (n=5-18 mice in 4-10 exp.; One-way ANOVA with Dunnett's multiple comparison). **(D)** Left, bar graph showing the mean + SD of epidermal LCs obtained from the back skin of B6 *Cd207<sup>DTR</sup>* mice, normalized to non-DT controls (n=3-7 mice in 3 exp.; One-way ANOVA with Dunnett's multiple comparison). Right, bar graph showing the mean + SD of Mig LCs in the back skin draining LN of B6 *Cd207<sup>DTR</sup>* mice, normalized to non-DT controls (n=4-22 mice in 3-7 exp.; One-way ANOVA with Dunnett's multiple comparison). **(E)** *LysM<sup>cre</sup> x Csf1r<sup>LSL-DTR</sup>* mice were injected with 50ng/gr body weight DT, and epidermis and sLN were collected 2 days (2d) or 2 months (2m) later. Top, representative flow cytometry plots of epidermal LCs. Bottom, representative flow cytometry plots of Mig LCs in sLN. **(F)** B6 *Cd207<sup>DTR</sup>* were inoculated with 50ng/gr body weight DT. One-week post-DT inoculation, mice ears were tape-stripped 12 times (+T/S) or not (-T/S). Two months post-DT, epidermis was collected. Left, schematic of experimental design. Right, LC numbers shown as the mean + SD (n=4-8 mice in 2 exp.; One-way ANOVA with Dunnett's multiple comparison). **(G)** B6 *Cd207<sup>DTR</sup>* were inoculated with 50 ng/gr body weight DT (+DT) or left untreated (-DT). Dermis was collected and analyzed at 2 days (2d) and 2 months (2m) post-DT. Bar graph showing the number + SD of dermal LCs (n=3-10 mice in 2-3 exp.; One-way ANOVA with Dunnett's multiple comparison).

### Supplementary Figure 3

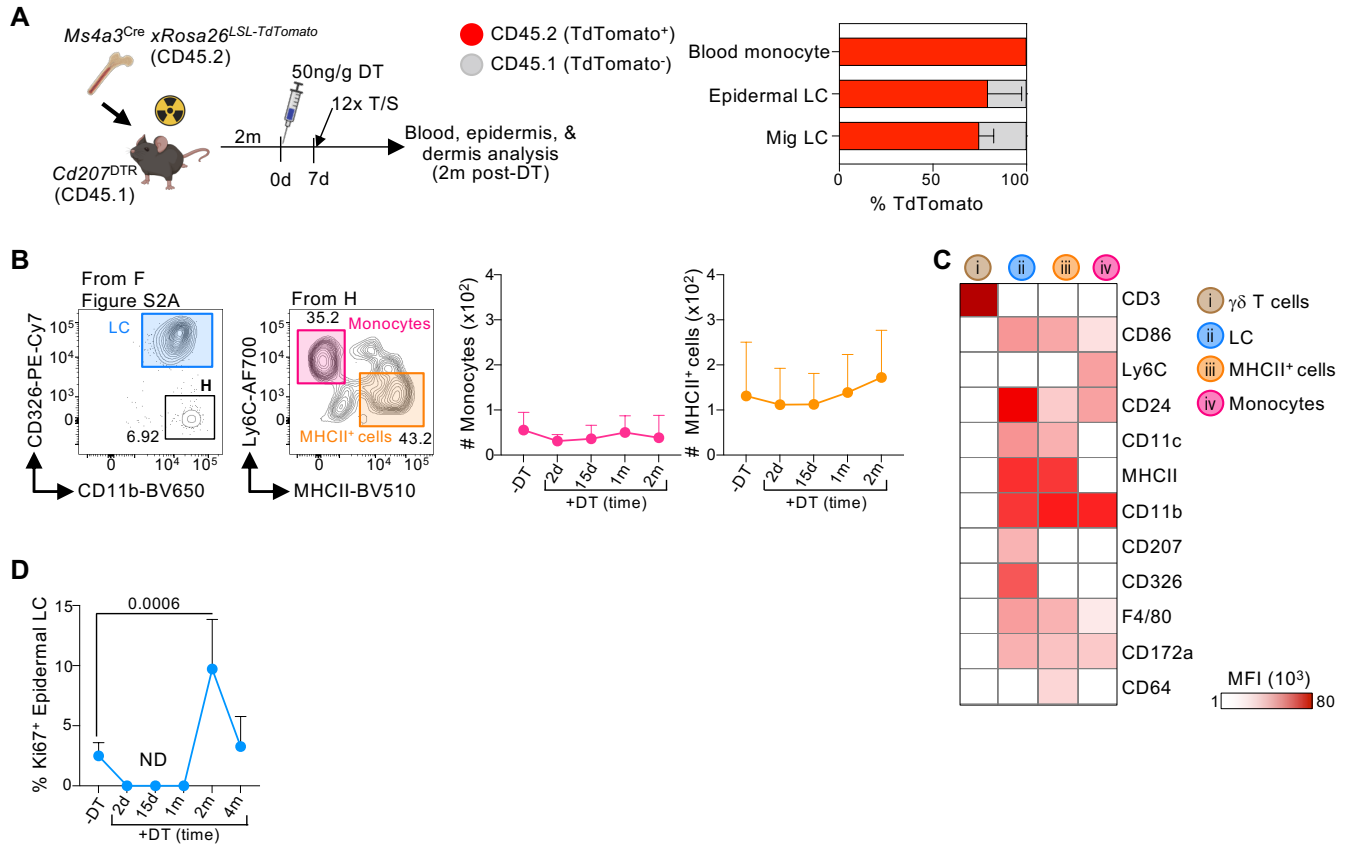

**FIGURE S3. Few monocytes infiltrate the epidermis, and differentiate into moLCs that undergo proliferation. (A)** B6 CD45.1 *Cd207<sup>DTR</sup>* mice were lethally irradiated and reconstituted with CD45.2 *Ms4a3<sup>cre</sup> x Rosa<sup>LSL-TdTomato</sup>* bone marrow. Two months later, 50ng/gr body weight DT was inoculated. One-week post-DT, mice were tape-stripped (T/S) 12 times, and epidermis, LN, and blood was collected 2 months after that. Left, experimental design. Right, bar graph showing mean + SD of TdTomato expression in each cell population, normalized to blood monocytes (n=3 mice in 1 exp.). **(B-D)** B6 *Cd207<sup>DTR</sup>* mice were treated (+DT) with 50ng/gr body weight DT, or not (-DT). **(B)** Left, gating strategy used to identify epidermal monocytes and MHCII<sup>+</sup> cells. Right, number of epidermal monocytes and MHCII<sup>+</sup> cells shown as the mean + SD (n=3-20 in 2-5 exp.; One-way ANOVA with Dunnett's multiple comparison). **(C)** Marker expression heatmap for each population of epidermal cells (n=2-3 mice in 1 exp.). **(D)** Frequency of Ki67<sup>+</sup> epidermal LCs, shown as the mean +SD (n=3-9 mice in 2-3 exp.; One-way ANOVA with Dunnett's multiple comparison). ND: not determined; d: days; m: months.

## Supplementary Figure 4

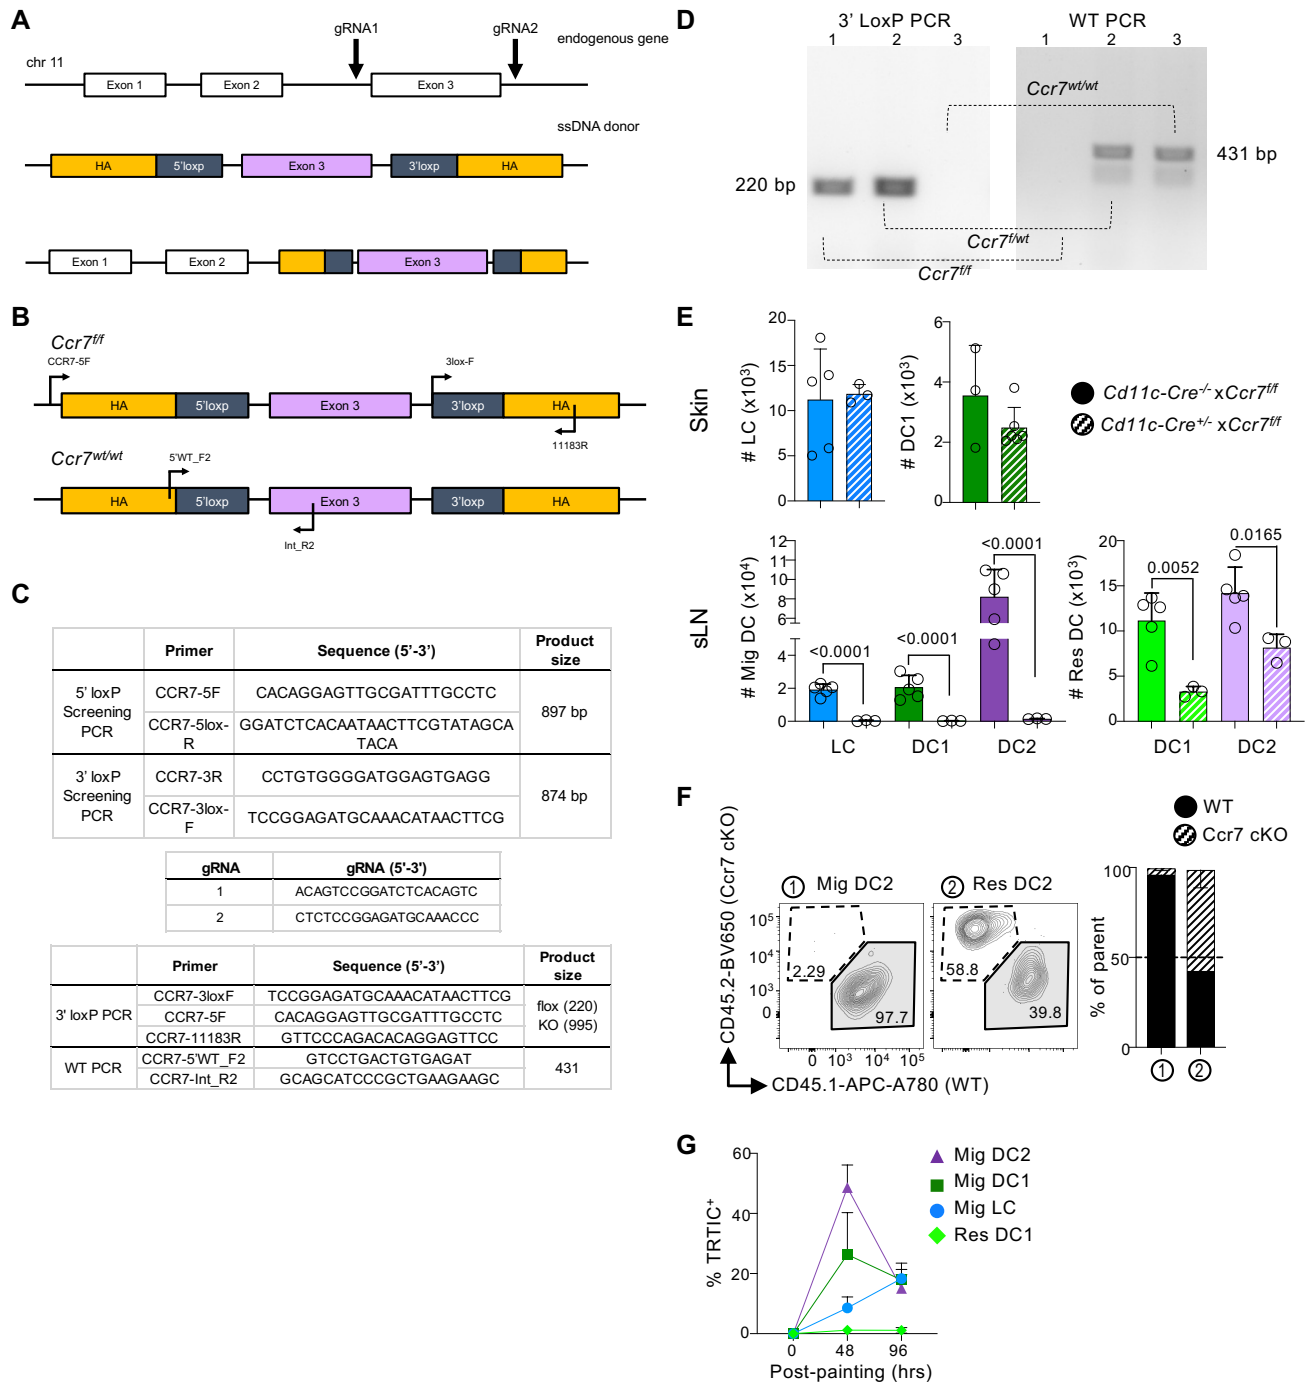

**FIGURE S4. Generation of *Ccr7<sup>fl/fl</sup>* mouse.** B6 murine zygotes were injected with sgRNA, Cas9 protein, and donor DNA containing homologous arms and loxp sites flanking exon 3 of the *Ccr7* gene. *Ccr7<sup>fl/fl</sup>* mice were bred to *Cd11c-Cre* mice to generate *Ccr7* conditional knockout (*Ccr7* cKO) mice. **(A)** Schematic showing CRISPR-Cas9 targeting strategy of exon 3 of the *Ccr7* gene (top), ssDNA donor DNA (middle), and final inserted transgene (bottom). **(B)** Schematic showing primer design for the detection of *Ccr7<sup>fl/fl</sup>* (top) and *Ccr7<sup>wt/wt</sup>* (bottom) mice. **(C)** Top, primer set used to screen founders for presence of inserted loxp sites. Middle, gRNA sequences used to target Cas9 for double stranded-breaks. Bottom, genotyping primers used to identify flox, WT, and germline deletions (KO). **(D)** Representative PCR showing examples of *Ccr7<sup>fl/fl</sup>* (1), *Ccr7<sup>wt/wt</sup>* (2), and *Ccr7<sup>wt/wt</sup>* (3) genotyping results. **(E)** Skin and sLN of *Ccr7* cKO (*Cd11c-Cre<sup>+/+</sup> x Ccr7<sup>fl/fl</sup>*) and control (*Cd11c-Cre<sup>-/-</sup> x Ccr7<sup>fl/fl</sup>*) mice were collected for myeloid cell quantification. Top, epidermal LCs (left) and dermal DC1s (right) shown as the mean + SD (n=3-6 mice in 3 exp.). Bottom, migratory DCs (left) and lymphoid-resident DCs (right) in sLNs shown as the mean + SD (n=3-5 mice in 2-3 exp; Student's t-test). **(F)** Experimental design as in Figure 3F-G. Representative flow cytometry plots (left) and frequency of cells expressing CD45.1 or CD45.2 (right) (mean + SD; n=9 mice in 2 exp.). **(G)** Ears of B6 WT mice were painted with 0.5% TRITC. 48-96 hrs later, sLN were collected and processed for flow cytometry analysis. %TRITC<sup>+</sup> cells shown as the mean + SD (n=4 mice in 2-3 exp.). chr: chromosome; gRNA: guide RNA; HA: homologous arm; bp: base pair; hrs: hours; Mig: Migratory; Res: lymphoid-resident.

## Supplementary Figure 5

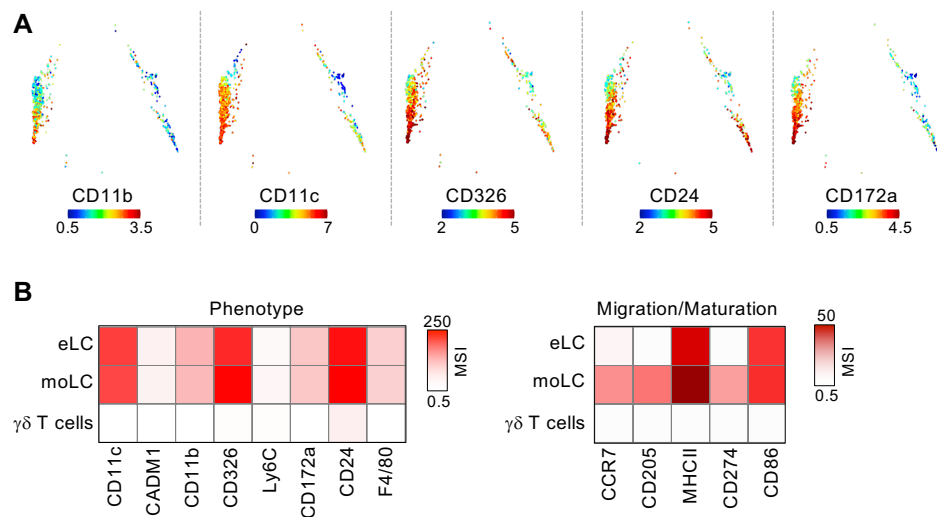

**FIGURE S5. Epidermal moLCs express higher levels of migration/maturation markers.** B6 *Cd207<sup>DTR</sup>* mice were inoculated with 50ng/gr body weight DT or left untreated. Two months after DT inoculation, whole skin (A) or epidermis (B) cell suspensions were collected, and analyzed by CyTOF. (A) Expression of the indicated markers in skin LCs, shown in the PHATE map of Figure 4A. (B) Expression of the indicated markers in epidermal eLCs (-DT) and moLCs (+DT) (n=2 mice in 2 exp.). MSI: Mean Signal Intensity.

## Supplementary Figure 6

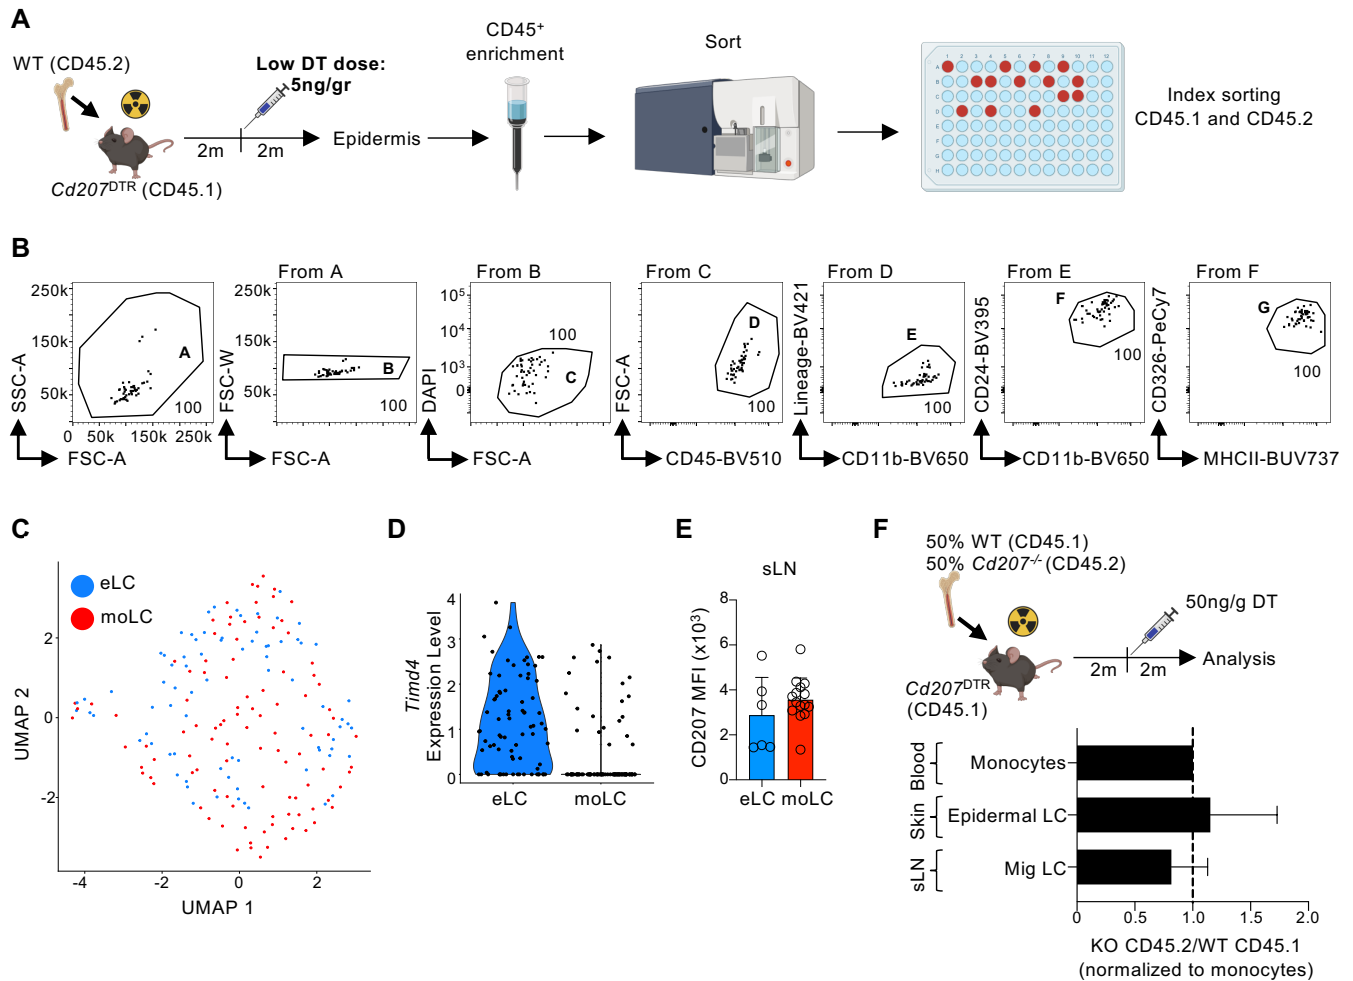

**FIGURE S6. Transcriptomic analysis of epidermal eLCs and moLCs. (A-D)** B6 CD45.1 *Cd207<sup>DTR</sup>* mice were lethally irradiated and transplanted with CD45.2 WT bone marrow. Two months later, a low dose of 5 ng/gr body weight DT was inoculated. Epidermal eLCs (CD45.1) and moLCs (CD45.2) were analyzed by SMART-seq2 two months post-DT. **(A)** Schematic of the experimental design. **(B)** Epidermal LCs were sorted using Fig.S2A strategy (lineage markers included Ly6G and SiglecF). Shown is the cell purity after sort via index sorting. **(C)** UMAP of eLCs (CD45.1) and moLCs (CD45.2). **(D)** Violin plot of *Timd4* expression. **(E)** B6 *Cd207<sup>DTR</sup>* were inoculated with 50 ng/gr body weight DT or left untreated. Two months later, sLN were collected and stained for flow cytometry. Expression of CD207 in migratory eLCs (-DT) and moLCs (+DT) in sLN, shown as the mean + SD (n=6-15 in 4 exp.; Student's t-test). **(F)** B6 *Cd207<sup>DTR</sup>* CD45.1 mice were lethally irradiated and transplanted with 50% WT (CD45.1) and 50% *Cd207<sup>-/-</sup>* bone marrow (CD45.2). Two months later, 50ng/gr body weight DT was inoculated. Skin, sLN, and blood were analyzed two months post-DT. Top, schematic of the experimental design. Bottom, ratio CD45.2/CD45.1 positive cells normalized to monocytes, and shown as the mean + SD (n=4 in 2 exp.).

**TABLE S1: Antibodies used for flow cytometry analysis and cell sorting.**

| Antibody                                             | Source                   | Cat#       | RRID              |
|------------------------------------------------------|--------------------------|------------|-------------------|
| Anti-mouse B7-H1 (MIH5) SuperBright 780              | eBioscience              | 78-5982-82 | RRID: AB_2724081  |
| Anti-mouse CCR7 (4B12) APC-eFluor®780                | Thermo Fisher Scientific | 47-1971-82 | RRID:AB_2573974   |
| Anti-mouse CD11b (M1/70) BV650                       | BioLegend                | 101239     | RRID: AB_11125575 |
| Anti-mouse CD11b (M1/70) APC-eFluor®780              | Thermo Fisher Scientific | 47-0112-82 | RRID:AB_1603193   |
| Anti-mouse CD11b (M1/70) eFluor®450                  | eBioscience              | 48-0112    | RRID: AB_1582237  |
| Anti-mouse CD11c (HL3) PE                            | BD Biosciences           | 561044     | RRID:AB_2033996   |
| Anti-mouse CD11c (HL3) BUV737                        | BD Biosciences           | 564986     | RRID: AB_2870123  |
| Anti-mouse CD172a (P84) BUV395                       | BD Biosciences           | 740282     | RRID:AB_2740021   |
| Anti-mouse CD19 (6D5) Alexa Fluor® 700               | BioLegend                | 115528     | RRID: AB_493735   |
| Anti-mouse CD19 (eBioD3) eFluor®450                  | eBioscience              | 48-0193-82 | RRID: AB_2734905  |
| Anti-mouse CD207 (ebiL31) PE                         | Thermo Fisher Scientific | 12-2075-82 | RRID:AB_763452    |
| Anti-mouse CD207 (L31) AF647                         | home-made                |            |                   |
| Anti-mouse CD24 (M1/69) APC-eFluor®780               | eBioscience              | 47-0242-82 | RRID: AB_10853190 |
| Anti-mouse CD24 (M1/69) BUV395                       | BD Biosciences           | 744471     | RRID: AB_2742259  |
| Anti-mouse CD25 (PC61) PerCP Cy5.5                   | BioLegend                | 102030     | RRID: AB_893288   |
| Anti-mouse CD3e (17A2) eFluor®450                    | BioLegend                | 100228     | RRID:AB_2562553   |
| Anti-mouse CD3e (17A2) Alexa Fluor® 700              | BioLegend                | 100216     | RRID: AB_493697   |
| Anti-mouse CD326 (G8.8) PE                           | eBioscience              | 12-5791    | RRID: AB_953615   |
| Anti-mouse CD326 (G8.8) Alexa Fluor® 700             | Biolegend                | 118239     | RRID:AB_2810353   |
| Anti-mouse CD326 (G8.8) PE-Cy7                       | eBioscience              | 25-5791-80 | RRID: AB_1724047  |
| Anti-mouse CD4 (GK1.5) BUV395                        | BD Biosciences           | 563790     | RRID: AB_2738426  |
| Anti-mouse CD45 (30-F11) Brilliant Violet 510™       | BioLegend                | 103138     | RRID: AB_2563061  |
| Anti-mouse CD45 (30-F11) BV785                       | BioLegend                | 103149     | RRID: AB_2564590  |
| Anti-mouse CD45.1 (A20) PE                           | BD Biosciences           | 561872     | RRID:AB_10897174  |
| Anti-mouse CD45.1 (A20) APC-eFluor®780               | Thermo Fisher Scientific | 47-0453-82 | RRID:AB_1582228   |
| Anti-mouse CD45.2 (104) BV650                        | BioLegend                | 109835     | RRID:AB_2563065   |
| Anti-mouse CD45.2 (104) PE                           | BioLegend                | 109807     | RRID:AB_313445    |
| Anti-mouse CD45.2 (104) PE-Cy7                       | BioLegend                | 109829     | RRID: AB_1186098  |
| Anti-mouse CD64 (X54-5/7.1) APC                      | BioLegend                | 139306     | RRID: AB_11219391 |
| Anti-mouse CD86(GL1) AF647                           | Biolegend                | 105019     | RRID:AB_493465    |
| Anti-mouse F4/80 (BM8) eFluor®450                    | eBioscience              | 48-4801-82 | RRID: AB_1548747  |
| Anti-mouse Foxp3 (FJK-16s) APC                       | eBioscience              | 17-5773-82 | RRID: AB_469457   |
| Anti-mouse Ki67 (SolA15) PE                          | Thermo Fisher Scientific | 12-5698-82 | RRID:AB_11150954  |
| Anti-mouse Ly6C (HK1.4) PerCP Cy5.5                  | Thermo Fisher Scientific | 45-5932-82 | RRID:AB_2723343   |
| Anti-mouse Ly6C (HK1.4) BV510                        | Biolegend                | 128033     | RRID:AB_2562351   |
| Anti-mouse Ly6C (HK1.4) Alexa Fluor® 700             | BioLegend                | 128024     | RRID: AB_10643270 |
| Anti-mouse Ly6G (1A8) BUV395                         | BD Biosciences           | 563978     | RRID:AB_2716852   |
| Anti-mouse Ly6G (1A8) Alexa Fluor® 700               | BioLegend                | 127622     | RRID: AB_10643269 |
| Anti-mouse MHCII (M5/114.15.2) BUV737                | BD Biosciences           | 748845     | RRID:AB_2873248   |
| Anti-mouse MHCII (M5/114.15.2) Brilliant Violet 510™ | BioLegend                | 107635     | RRID: AB_2561397  |
| Anti-mouse NK1.1 (PK136) eFluor®450                  | Thermo Fisher Scientific | 48-5941-82 | RRID: AB_2043877  |
| Anti-mouse NK1.1 (PK136) Alexa Fluor® 700            | BioLegend                | 108730     | RRID: AB_2291262  |
| Anti-mouse SiglecF (E50-2440) eFluor®450             | BD Biosciences           | 562681     | RRID:AB_2722581   |
| Anti-mouse Tim4 (RMT4-54) PE                         | Biolegend                | 130005     | RRID:AB_2201843   |
| Anti-mouse XCR1 (ZET) APC                            | BioLegend                | 148205     | RRID:AB_2563931   |
| Anti-mouse XCR1 (ZET) PerCP Cy5.5                    | BioLegend                | 148208     | RRID: AB_2564364  |



**TABLE S2: Antibodies used for CyTOF analysis.**

| <b>Metal</b> | <b>Marker</b> | <b>Clone</b> | <b>Company/RRID</b>                      |
|--------------|---------------|--------------|------------------------------------------|
| Pd104        | CD45          | 30-F11       | Thermo Fisher Scientific AB_467251       |
| Pd106        | CD45          | 30-F11       | Thermo Fisher Scientific AB_467251       |
| Pd108        | CD45          | 30-F11       | Thermo Fisher Scientific AB_467251       |
| Y89          | CD45          | 30-F11       | Fluidigm RRID: AB_2651152                |
| In113        | CD45          | 30-F11       | Thermo Fisher Scientific AB_467251       |
| In115        | PDCA1         | eBio927      | Biologend RRID: AB_1953281               |
| Pr141        | Ly6G          | 1A8          | Fluidigm RRID: AB_2814678                |
| Nd143        | CD11b         | M1/70        | Fluidigm RRID: AB_2811240                |
| Nd144        | B220          | RA3-6B2      | Fluidigm RRID: AB_2811239                |
| Nd145        | MHCII         | M5/114.15.2  | Biologend RRID: AB_2563771               |
| Nd146        | EpCAM         | G8.8         | Biologend RRID: AB_2563743               |
| Sm147        | CD172a        | P84          | Biologend RRID: AB_11203723              |
| Nd148        | CD127         | A7R34        | Biologend RRID: AB_2563716               |
| Sm149        | CD19          | 6D5          | Fluidigm RRID: AB_2814679                |
| Nd150        | Ly6C          | HK1.4        | Biologend RRID: AB_2563783               |
| Eu151        | CD64          | X54-5/7.1    | Fluidigm RRID: AB_2814680                |
| Sm152        | CD3           | 1452C11      | RRID:AB_468847                           |
| Eu153        | CD335         | 29A1.4       | Biologend RRID: AB_2563744               |
| Sm154        | CD24          | M1/69        | Biologend RRID: AB_2563732               |
| Gd155        | FceR1a        | Mar-1        | Biologend RRID: AB_2563768               |
| Gd156        | CD14          | Sa14-2       | Fluidigm RRID: AB_2814681                |
| Gd157        | CD205         | NLDC         | homemade                                 |
| Gd158        | SiglecH       | 551          | Biologend RRID: AB_1227757               |
| Tb159        | F4/80         | BM8          | Fluidigm RRID: AB_2811238                |
| Gd160        | MGL2          | URA-1        | Biologend RRID: AB_2562711               |
| Dy161        | CD8           | 53-6.7       | Biologend RRID: AB_2562796               |
| Bi209        | CD11c         | N418         | Fluidigm RRID: AB_2814682                |
| Dy163        | XCR1          | Zet          | Biologend RRID: AB_2563841               |
| Dy164        | CCR7          | 4B12         | Fluidigm RRID: AB_2814683                |
| Ho165        | CCR2          | 475301       | R&D Systems RRID: AB_10718414            |
| Er166        | Cx3CR1        | SA011F11     | Biologend RRID: AB_2564313               |
| Er167        | CD115         | AFS98        | Biologend RRID: AB_2563709               |
| Er168        | CD116         | 698423       | ThermoFisher Scientific RRID AB_2608189  |
| Tm169        | PDL1          | MiH5         | Thermo Fisher Scientific RRID: AB_467781 |
| Yb171        | CD103         | M290         | BD Pharmingen RRID: AB_394995            |
| Yb172        | CD86          | GL1          | Biologend RRID: AB_313144                |
| Yb173        | CD117         | 2B8          | Fluidigm RRID: AB_2811230                |
| Yb174        | CD135         | A2F10        | ThermoFisher Scientific RRID AB_467481   |
| Lu175        | Cadm1         | 3E1          | MBL RRID: AB_592783                      |
| CD116        | Ly6D          | 49-H4        | BD Pharmingen RRID: AB_396664            |

**TABLE S3: Antibodies used for microscopy analysis.**

| Antibody           | Fluorochrome     | RRID       | Isotype              | Final concentration | Source                   | 2 <sup>nd</sup> antibody          | RRID 2 <sup>nd</sup> antibody | Final concentration 2 <sup>nd</sup> antibody | Source 2 <sup>nd</sup> antibody |
|--------------------|------------------|------------|----------------------|---------------------|--------------------------|-----------------------------------|-------------------------------|----------------------------------------------|---------------------------------|
| CD45.1             | Biotin           | AB_395042  | Mouse (SJL) IgG2a, κ | 3 µg/ml             | BD Biosciences           | Sva Brilliant Violet 421          | -                             | 2 µg/ml                                      | Biolegend                       |
| CD45.2             | Purified         | AB_467261  | Mouse (SJL) IgG2a, κ | 3 µg/ml             | Thermo Fisher Scientific | anti-Rat Alexa Fluor® 555         | AB_2896336                    | 1 µg/ml                                      | Thermo Fisher Scientific        |
| GFP                | Purified         | AB_221569  | Rabbit IgG           | 4 µg/ml             | Thermo Fisher Scientific | anti-Rabbit Alexa Fluor® 488      | AB_143165                     | 1 µg/ml                                      | Thermo Fisher Scientific        |
| I-A/I-E            | Alexa Fluor® 647 | AB_493525  | Rat IgG2b, κ         | 1 µg/ml             | Biolegend                | -                                 | -                             | -                                            | -                               |
| TCR $\gamma\delta$ | Alexa Fluor® 488 | AB_2562771 | Ar. Hamster IgG      | 2.5 µg/ml           | Biolegend                | -                                 | -                             | -                                            | -                               |
| TCR $\gamma\delta$ | PE               | AB_465934  | Ar. Hamster IgG      | 1 µg/ml             | Thermo Fisher Scientific | Anti-Ar. Hamster Alexa Fluor® 555 | AB_2925787                    | 1 µg/ml                                      | Thermo Fisher Scientific        |
